# Supplementary material for: Development of a universal endogenous qPCR control for eukaryotic DNA samples
Source: PubMed Central journal article supplement (PMC7160944; doi:10.1186/s13007-020-00597-2), 2020-04-16
Supplement: 13007_2020_597_MOESM1_ESM.pdf [file 13007_2020_597_MOESM1_ESM.pdf]

## Additional file 1

**Table S1** Checklist of MIQE guidelines.

|                                                                                                                           |                                                                                                                                                                          |
|---------------------------------------------------------------------------------------------------------------------------|--------------------------------------------------------------------------------------------------------------------------------------------------------------------------|
| <b>Experimental design of 28S rDNA (28S) quantitative real-time PCR based on the MIQE-guidelines (Bustin et al. 2009)</b> |                                                                                                                                                                          |
| Definition of experimental and control groups                                                                             | see Methods section                                                                                                                                                      |
| Number within each group                                                                                                  | see Methods section                                                                                                                                                      |
| Assay carried out by the core or investigator's laboratory?                                                               | Investigator's laboratory                                                                                                                                                |
| Acknowledgment of authors' contributions                                                                                  | See Author Contributions section                                                                                                                                         |
| <b>Sample</b>                                                                                                             |                                                                                                                                                                          |
| Description                                                                                                               | see Methods section, 43 different eukaryotic species                                                                                                                     |
| Volume/mass of sample processed                                                                                           | see Table 2                                                                                                                                                              |
| Microdissection or macrodissection                                                                                        | Not applicable                                                                                                                                                           |
| Processing procedure                                                                                                      | see Methods section                                                                                                                                                      |
| If frozen, how and how quickly?                                                                                           | Insects were frozen immediately after sampling at -80 °C, all other tissues were immediately processed with the respective DNA extraction kit. see Methods section)      |
| If fixed, with what and how quickly?                                                                                      | Not fixed                                                                                                                                                                |
| Sample storage conditions and duration                                                                                    | DNA samples and plasmid standard dilution series were stored at -20°C. RNA samples were stored at -80°C.                                                                 |
| <b>Nucleic acid extraction</b>                                                                                            |                                                                                                                                                                          |
| Procedure and/or instrumentation                                                                                          | see Methods section                                                                                                                                                      |
| Name of kit and details of any modifications                                                                              | DNeasy Blood and Tissue extraction Kit (Qiagen) or Nucleo Spin <sup>®</sup> Tissue kit; RNeasy Plant Mini Kit (Qiagen)                                                   |
| Source of additional reagents used                                                                                        | Not applicable                                                                                                                                                           |
| Details of DNase or RNase treatment                                                                                       | RNase used as described in the respective manual for DNA extraction. DNase treatment of RNA with TURBO DNA-free <sup>™</sup> Kit (ThermoFisher), prior to cDNA synthesis |
| Contamination assessment                                                                                                  | see Methods section                                                                                                                                                      |
| Nucleic acid quantification                                                                                               | see Methods section                                                                                                                                                      |
| Instrument and method                                                                                                     | NanoDrop <sup>™</sup> 1000 or NanoDrop <sup>™</sup> 3300                                                                                                                 |

|                                                   |                                                                                                                                                       |
|---------------------------------------------------|-------------------------------------------------------------------------------------------------------------------------------------------------------|
| Purity (A260/A280)                                | Not performed                                                                                                                                         |
| Yield                                             | Not performed                                                                                                                                         |
| RNA integrity: method/instrument                  | Not performed                                                                                                                                         |
| RIN/RQI or Cq of 3' and 5' transcripts            | Not performed                                                                                                                                         |
| Electrophoresis traces                            | Not performed                                                                                                                                         |
| Inhibition testing                                | Dilution series of samples; the assay amplifies a target of eukaryotic host DNA as a proxy for PCR-competency of the sample and to quantify host DNA. |
| Reverse transcription                             | SuperScript™ VILO™ cDNA Synthesis Kit (ThermoFisher)                                                                                                  |
| <b>qPCR target information</b>                    |                                                                                                                                                       |
| Gene symbol                                       | 28S                                                                                                                                                   |
| Sequence accession number                         | Basis for primer design were different 28S rDNA sequences from 14 Auchenoryncha species                                                               |
| Location of amplicon                              | cds                                                                                                                                                   |
| Amplicon length                                   | 84 bp                                                                                                                                                 |
| In silico specificity screen (BLAST, and so on)   | Specificity of the primers and sequence similarity of the amplicon was confirmed using Geneious 11.1.4 sequence assembly.                             |
| Pseudogenes, retropseudogenes, or other homologs? | Not applicable                                                                                                                                        |
| Sequence alignment                                | See in silico specificity screen                                                                                                                      |
| Secondary structure analysis of amplicon          | Not analyzed                                                                                                                                          |
| Location of each primer by exon or intron         | Exon                                                                                                                                                  |
| What splice variants are targeted?                | Not analyzed                                                                                                                                          |
| <b>qPCR oligonucleotides</b>                      |                                                                                                                                                       |
| Primer sequences                                  | UNI28S-fwd: CTACTATCTAGCGAAACC<br>UNI28S-rev: AYTAGAGTCAAGCTCAAC                                                                                      |
| RTPrimerDB identification number                  | Not applicable                                                                                                                                        |
| Probe sequences                                   | AAA+G+A+AG+A+C+C+C+T                                                                                                                                  |
| Location and identity of any modifications        | Hex labelled 5' end and DAB labelled 3' end.<br>Incorporation of LNAs (indicated with +)                                                              |
| Manufacturer of oligonucleotides                  | Microsynth AG (Balgach, Switzerland), probe was manufactured by EuroClone S.P.A. (Italy)                                                              |
| Purification method                               | HPLC purified                                                                                                                                         |

| <b>qPCR protocol</b>                                                 |                                                                                                                                                        |
|----------------------------------------------------------------------|--------------------------------------------------------------------------------------------------------------------------------------------------------|
| Complete reaction conditions                                         | see Methods section                                                                                                                                    |
| Reaction volume and amount of DNA                                    | 2 µl of DNA in 10 µl total reaction volume                                                                                                             |
| Primer concentrations                                                | 400 nM in probe-based assay or 250 nM in SYBR-Green assay                                                                                              |
| Polymerase identity and concentration                                | Polymerase included in 2x iQ™ Multiplex Powermix (Biorad) or 2 x SYBR® FAST qPCR Kit Master Mix (Kapa Biosystems)                                      |
| Kit identity and manufacturer                                        | iQ™ Multiplex Powermix (Biorad)<br>KAPA SYBR® FAST qPCR Master Mix (2X) Kit (Kapa Biosystems)                                                          |
| Exact chemical composition of the buffer                             | Not applicable                                                                                                                                         |
| Additives                                                            | No additives and no ROX                                                                                                                                |
| Manufacturer of plates and catalog number                            | Hard-Shell® 384-Well PCR Plates (Bio-Rad), catalog number: HSP3801                                                                                     |
| Complete thermocycling parameters                                    | see Methods section                                                                                                                                    |
| Reaction setup                                                       | Mastermix and template distribution into 384-well plates was performed by hand pipetting.                                                              |
| Manufacturer of qPCR instrument                                      | CFX384 Touch™ Real-Time PCR Detection System, Bio-Rad Laboratories                                                                                     |
| <b>qPCR validation</b>                                               |                                                                                                                                                        |
| Evidence of optimization                                             | see Methods section                                                                                                                                    |
| Specificity                                                          | see Results section                                                                                                                                    |
| C <sub>q</sub> of NTC                                                | C <sub>q</sub> values varied from run to run, but never showed specific product amplification curves.                                                  |
| Calibration curves with slope and y intercept                        | Slope was between -3.449 (95% PCR efficiency) and -3.207 (105% PCR efficiency).                                                                        |
| PCR efficiency calculated from slope                                 | Only runs with a PCR efficiency between 95% and 105% were considered for evaluation.                                                                   |
| Confidence intervalls (CI) for PCR efficiency or standard error (SE) | $R^2 \geq 0.99$ as a function of CI and SE                                                                                                             |
| r <sup>2</sup> of calibration curve                                  | $\geq 0.99$                                                                                                                                            |
| Linear dynamic range                                                 | 50-500,000 28S gene copies reaction <sup>-1</sup>                                                                                                      |
| C <sub>q</sub> variation at limit of detection                       | Not performed                                                                                                                                          |
| Confidence intervalls throughout range                               | Not applicable                                                                                                                                         |
| Evidence for limit of detection                                      | only results within the linear dynamic range were considered for quantification, however LOD could be defined as 5 28S copies reaction <sup>-1</sup> . |

| <b>Data analysis</b>                                  |                                                                                                                                                                                                                                                                                                                                                            |
|-------------------------------------------------------|------------------------------------------------------------------------------------------------------------------------------------------------------------------------------------------------------------------------------------------------------------------------------------------------------------------------------------------------------------|
| qPCR analysis software                                | CFX manager™ software (Bio-Rad Laboratories)                                                                                                                                                                                                                                                                                                               |
| Method of C <sub>q</sub> determination                | Threshold was set at optimum PCR efficiency (nearest 100%).                                                                                                                                                                                                                                                                                                |
| Outlier identification and disposition                | When using SYBR-Green based qPCR melting curves of all samples were analysed                                                                                                                                                                                                                                                                               |
| Results for NTCs                                      | NTCs had no specific amplicon melting peak                                                                                                                                                                                                                                                                                                                 |
| Justification of number and choice of reference genes | No gene expression study was performed with these primers                                                                                                                                                                                                                                                                                                  |
| Description of normalization method                   | see Methods section                                                                                                                                                                                                                                                                                                                                        |
| Number and concordance of biological replicates       | Not applicable                                                                                                                                                                                                                                                                                                                                             |
| Number of technical replicates                        | All samples were analysed in triplicates                                                                                                                                                                                                                                                                                                                   |
| Repeatability (intraassay variation)                  | Intraassay variation was determined for five independent runs using four different template concentrations (see Fig. 4). The average C <sub>q</sub> -value variation of technical triplicates was maximum 5.1% (based on the average C <sub>q</sub> -value) within the same run (see Fig. 4).                                                              |
| Reproducibility (interassay variation)                | Based on the comparison of five independent runs with the same four-point standard curve in triplicates and a similar intercept (38.74±0.35) the average C <sub>q</sub> -value of each individual standard dilution did not vary more than 3.7% (based on the average C <sub>q</sub> -value of all five independent runs) between the assays (see Fig. 4). |
| Power analysis                                        | Not performed                                                                                                                                                                                                                                                                                                                                              |
| Statistical methods for results significance          | Two-way ANOVA with Tukey's multiple comparison test                                                                                                                                                                                                                                                                                                        |
| Software                                              | GraphPad Prism 7.01                                                                                                                                                                                                                                                                                                                                        |
| C <sub>q</sub> or raw data submission with RDML       | See Data Availability Statement section                                                                                                                                                                                                                                                                                                                    |

Details on qPCR performance of endogenous control 28S rDNA assay, determined according to the MIQE guidelines.

**Table S2** Annealing temperature gradient

| <b>Tm [°C]</b> | <b>Target</b> | <b>Sample</b>           | <b>C<sub>q</sub></b> | <b>Mean C<sub>q</sub></b> | <b>Standard Deviation</b> |
|----------------|---------------|-------------------------|----------------------|---------------------------|---------------------------|
| 60.0           | 28S           | DNA from insect (1:10)  | 16.14                | 16.43                     | 0.25                      |
|                | 28S           | DNA from insect (1:10)  | 16.52                |                           |                           |
|                | 28S           | DNA from insect (1:10)  | 16.62                |                           |                           |
| 59.1           | 28S           | DNA from insect (1:10)  | 16.58                | 16.30                     | 0.24                      |
|                | 28S           | DNA from insect (1:10)  | 16.20                |                           |                           |
|                | 28S           | DNA from insect (1:10)  | 16.13                |                           |                           |
| 57.6           | 28S           | DNA from insect (1:10)  | 15.90                | 15.85                     | 0.06                      |
|                | 28S           | DNA from insect (1:10)  | 15.88                |                           |                           |
|                | 28S           | DNA from insect (1:10)  | 15.78                |                           |                           |
| 55.6           | 28S           | DNA from insect (1:10)  | 15.49                | 15.45                     | 0.18                      |
|                | 28S           | DNA from insect (1:10)  | 15.61                |                           |                           |
|                | 28S           | DNA from insect (1:10)  | 15.26                |                           |                           |
| 54.4           | 28S           | DNA from insect (1:10)  | 15.73                | 15.83                     | 0.10                      |
|                | 28S           | DNA from insect (1:10)  | 15.84                |                           |                           |
|                | 28S           | DNA from insect (1:10)  | 15.93                |                           |                           |
| 53.4           | 28S           | DNA from insect (1:10)  | 15.81                | 15.83                     | 0.10                      |
|                | 28S           | DNA from insect (1:10)  | 15.74                |                           |                           |
|                | 28S           | DNA from insect (1:10)  | 15.93                |                           |                           |
| 51.8           | 28S           | DNA from insect (1:10)  | 16.56                | 15.94                     | 0.58                      |
|                | 28S           | DNA from insect (1:10)  | 15.83                |                           |                           |
|                | 28S           | DNA from insect (1:10)  | 15.42                |                           |                           |
| 50.6           | 28S           | DNA from insect (1:10)  | 15.50                | 15.45                     | 0.07                      |
|                | 28S           | DNA from insect (1:10)  | 15.49                |                           |                           |
|                | 28S           | DNA from insect (1:10)  | 15.37                |                           |                           |
| 50.0           | 28S           | DNA from insect (1:10)  | 15.73                | 15.67                     | 0.08                      |
|                | 28S           | DNA from insect (1:10)  | 15.70                |                           |                           |
|                | 28S           | DNA from insect (1:10)  | 15.58                |                           |                           |
| 50.2           | 28S           | NTC* (H <sub>2</sub> O) | 24.02                | 24.02                     | 0.05                      |
|                | 28S           | NTC* (H <sub>2</sub> O) | 24.06                |                           |                           |
|                | 28S           | NTC* (H <sub>2</sub> O) | 23.97                |                           |                           |

In a total reaction volume of 10 µl 500 nM UNI28S-fwd, 500 nM UNI28-rev Primer and 1X SYBR® FAST qPCR Kit Master Mix (Kapa Biosystems) were used.

\*the NTCs showed an amplification curve. This is caused by primer dimers in the absence of a template. Adaption of primer concentrations abolished this problem (see Supplementary Table 3)

**Fig. S1** Annealing temperature gradient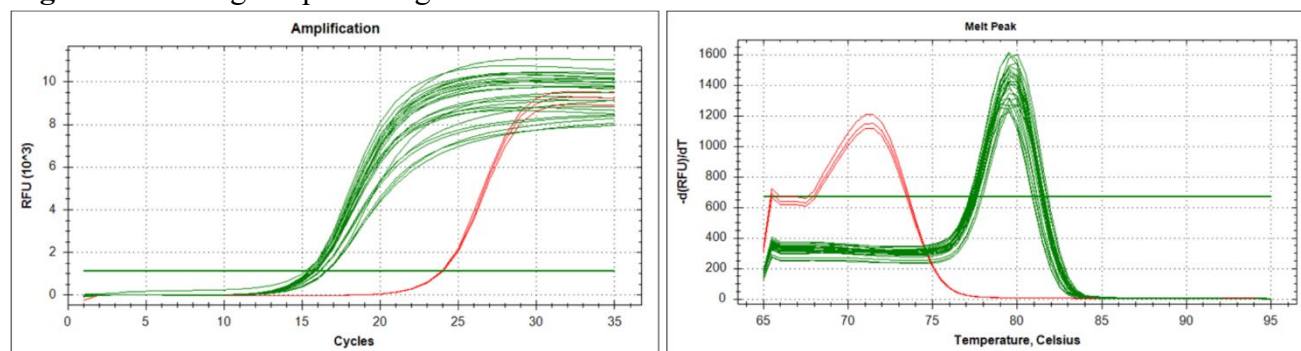

Amplification curves and melt peak of annealing temperature gradient. red line: NTC control (nuclease free water); green line: pool of different insects (1:10 diluted in nuclease free water)

**Table S3** Primer matrix

| forward primer<br>UNI28-fwd<br>[nM] | reverse primer<br>UNI28-rev<br>[nM] | Target | Sample                 | C <sub>q</sub> | Mean C <sub>q</sub> | Standard Deviation |
|-------------------------------------|-------------------------------------|--------|------------------------|----------------|---------------------|--------------------|
| 500                                 | 500                                 | 28S    | DNA from insect (1:10) | 16.2           | 16.06               | 0.11               |
| 500                                 | 500                                 | 28S    | DNA from insect (1:10) | 16.1           |                     |                    |
| 500                                 | 500                                 | 28S    | DNA from insect (1:10) | 15.9           |                     |                    |
| 500                                 | 500                                 | 28S    | NTC (H <sub>2</sub> O) | 30.9           | 31.68               | 1.10               |
| 500                                 | 500                                 | 28S    | NTC (H <sub>2</sub> O) | 32.5           |                     |                    |
| 500                                 | 500                                 | 28S    | NTC (H <sub>2</sub> O) | N/A            |                     |                    |
| 500                                 | 250                                 | 28S    | DNA from insect (1:10) | 16.9           | 16.61               | 0.27               |
| 500                                 | 250                                 | 28S    | DNA from insect (1:10) | 16.5           |                     |                    |
| 500                                 | 250                                 | 28S    | DNA from insect (1:10) | 16.4           |                     |                    |
| 500                                 | 250                                 | 28S    | NTC (H <sub>2</sub> O) | N/A            | 34.46               | 0.50               |
| 500                                 | 250                                 | 28S    | NTC (H <sub>2</sub> O) | 34.8           |                     |                    |
| 500                                 | 250                                 | 28S    | NTC (H <sub>2</sub> O) | 34.1           |                     |                    |
| 500                                 | 125                                 | 28S    | DNA from insect (1:10) | 27.3           | 21.04               | 5.45               |
| 500                                 | 125                                 | 28S    | DNA from insect (1:10) | 18             |                     |                    |
| 500                                 | 125                                 | 28S    | DNA from insect (1:10) | 17.8           |                     |                    |
| 500                                 | 125                                 | 28S    | NTC (H <sub>2</sub> O) | N/A            | N/A                 | N/A                |
| 500                                 | 125                                 | 28S    | NTC (H <sub>2</sub> O) | N/A            |                     |                    |
| 500                                 | 125                                 | 28S    | NTC (H <sub>2</sub> O) | N/A            |                     |                    |
| 250                                 | 500                                 | 28S    | DNA from insect (1:10) | 17.2           | 16.83               | 0.35               |
| 250                                 | 500                                 | 28S    | DNA from insect (1:10) | 16.7           |                     |                    |
| 250                                 | 500                                 | 28S    | DNA from insect (1:10) | 16.6           |                     |                    |

|     |     |     |                        |      |       |      |
|-----|-----|-----|------------------------|------|-------|------|
| 250 | 500 | 28S | NTC (H <sub>2</sub> O) | 33   | 32.75 | 0.71 |
| 250 | 500 | 28S | NTC (H <sub>2</sub> O) | 33.3 |       |      |
| 250 | 500 | 28S | NTC (H <sub>2</sub> O) | 32   |       |      |
| 250 | 250 | 28S | DNA from insect (1:10) | 16.8 | 16.81 | 0.17 |
| 250 | 250 | 28S | DNA from insect (1:10) | 16.7 |       |      |
| 250 | 250 | 28S | DNA from insect (1:10) | 17   |       |      |
| 250 | 250 | 28S | NTC (H <sub>2</sub> O) | 34.3 | 34.48 | 0.22 |
| 250 | 250 | 28S | NTC (H <sub>2</sub> O) | N/A  |       |      |
| 250 | 250 | 28S | NTC (H <sub>2</sub> O) | 34.6 |       |      |
| 250 | 250 | 28S | DNA from insect (1:10) | 18.1 | 18.43 | 0.32 |
| 250 | 250 | 28S | DNA from insect (1:10) | 18.5 |       |      |
| 250 | 250 | 28S | DNA from insect (1:10) | 18.7 |       |      |
| 250 | 250 | 28S | NTC (H <sub>2</sub> O) | N/A  | N/A   | N/A  |
| 250 | 250 | 28S | NTC (H <sub>2</sub> O) | N/A  |       |      |
| 250 | 250 | 28S | NTC (H <sub>2</sub> O) | N/A  |       |      |
| 125 | 125 | 28S | DNA from insect (1:10) | 18.2 | 18.49 | 0.45 |
| 125 | 125 | 28S | DNA from insect (1:10) | 18.3 |       |      |
| 125 | 125 | 28S | DNA from insect (1:10) | 19   |       |      |
| 125 | 125 | 28S | NTC (H <sub>2</sub> O) | N/A  | 33.38 | 0.96 |
| 125 | 125 | 28S | NTC (H <sub>2</sub> O) | 34.1 |       |      |
| 125 | 125 | 28S | NTC (H <sub>2</sub> O) | 32.7 |       |      |
| 125 | 250 | 28S | DNA from insect (1:10) | 18.5 | 18.47 | 0.12 |
| 125 | 250 | 28S | DNA from insect (1:10) | 18.6 |       |      |
| 125 | 250 | 28S | DNA from insect (1:10) | 18.4 |       |      |
| 125 | 250 | 28S | NTC (H <sub>2</sub> O) | N/A  |       |      |
| 125 | 250 | 28S | NTC (H <sub>2</sub> O) | N/A  |       |      |
| 125 | 250 | 28S | NTC (H <sub>2</sub> O) | N/A  |       |      |
| 125 | 125 | 28S | DNA from insect (1:10) | 21   | 21.94 | 2.59 |
| 125 | 125 | 28S | DNA from insect (1:10) | 19.9 |       |      |
| 125 | 125 | 28S | DNA from insect (1:10) | 24.9 |       |      |
| 125 | 125 | 28S | NTC (H <sub>2</sub> O) | N/A  | N/A   | N/A  |
| 125 | 125 | 28S | NTC (H <sub>2</sub> O) | N/A  |       |      |
| 125 | 125 | 28S | NTC (H <sub>2</sub> O) | N/A  |       |      |

Primer matrix of UNI28S-fwd and UNI28S-rev

Fig. S2 Primer matrix

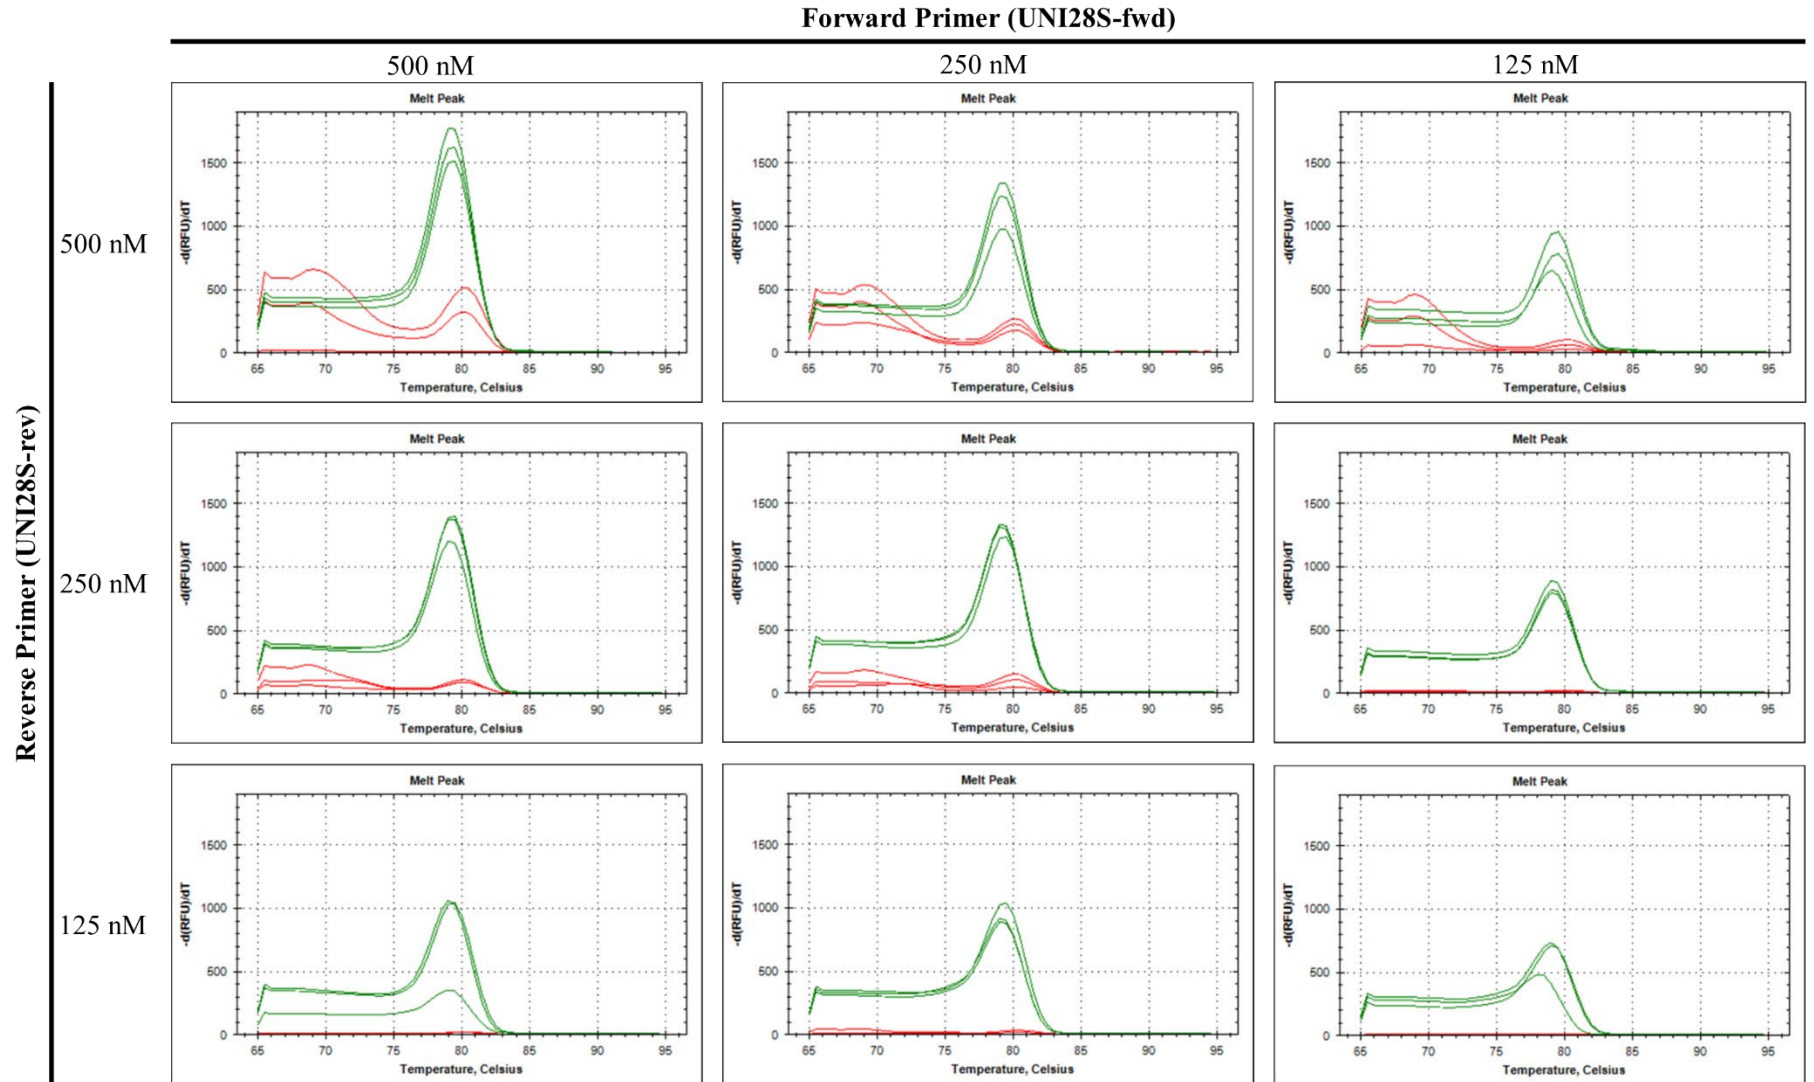

Melt peaks of different forward and reverse primer combinations (primer matrix, see Supplementary Table 3). red line: NTC control (nuclease free water); green line: pool of different insects (1:10 diluted in nuclease free water)



**Fig. S3** Effect of MgCl<sub>2</sub> concentrations on PCR reaction

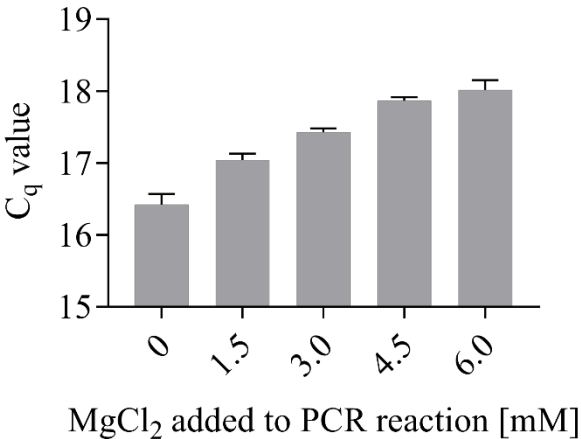

Effect of increased MgCl<sub>2</sub> concentrations on 28S amplification with UNI28S-primers.

**Table S4** Comparison of different apple specific internal controls

|           | Sample 1   |            |            | Sample 2   |            |            | Sample 3   |            |            |
|-----------|------------|------------|------------|------------|------------|------------|------------|------------|------------|
|           | 28 S       | cpLeu      | ACO        | 28 S       | cpLeu      | ACO        | 28 S       | cpLeu      | ACO        |
| undiluted | 17.91      | 15.29      | 22.49      | 16.79      | 15.26      | 23.16      | 18.71      | 15.04      | 22.74      |
|           | 18.28      | 15.28      | 22.46      | 16.99      | 15.17      | 22.81      | 18.69      | 15.01      | 22.82      |
|           | 18.95      | 15.25      | 22.19      | 17.02      | 15.21      | 23.07      | 19.2       | 14.95      | 22.75      |
| Mean±SEM  | 18.38±0.30 | 15.27±0.01 | 22.38±0.10 | 16.93±0.07 | 15.21±0.03 | 23.01±0.10 | 18.87±0.17 | 15.00±0.03 | 22.77±0.03 |
| 1:10      | 21.73      | 18.7       | 25.78      | 19.87      | 18.77      | 26.43      | 21.78      | 18.4       | 26.41      |
|           | 21.22      | 18.81      | 25.69      | 20.06      | 18.04      | 26.29      | 21.59      | 18.46      | 26.47      |
|           | 21.2       | 18.7       | 25.52      | 20.64      | 18.7       | 26.39      | 21.51      | 18.38      | 26.44      |
| Mean±SEM  | 21.38±0.17 | 18.74±0.04 | 25.66±0.08 | 20.19±0.23 | 18.50±0.23 | 26.37±0.04 | 21.63±0.08 | 18.41±0.02 | 26.44±0.02 |
| 1:100     | 25.18      | 21.98      | 29.14      | 23.5       | 21.87      | 29.81      | 24.95      | 21.75      | 29.52      |
|           | 24.73      | 21.97      | 29.21      | 23.38      | 21.82      | 29.67      | 25.02      | 21.79      | 29.66      |
|           | 24.31      | 21.97      | 28.9       | 23.61      | 21.99      | 29.98      | 25.18      | 21.73      | 29.55      |
| Mean±SEM  | 24.74±0.25 | 21.97±0.00 | 29.08±0.09 | 23.50±0.07 | 21.89±0.05 | 29.82±0.09 | 25.05±0.07 | 21.76±0.02 | 29.58±0.04 |
| 1:1,000   | 28.6       | 25.47      | 32.58      | 27.01      | 25.37      | 33.05      | 28.65      | 25.38      | 32.87      |
|           | 28.53      | 25.57      | 32.85      | 26.92      | 25.45      | 33.5       | 28.69      | 25.36      | 33.22      |
|           | 28.37      | 25.33      | 32.41      | 27.14      | 25.32      | 32.93      | 28.37      | 25.24      | 33.12      |
| Mean±SEM  | 28.50±0.07 | 25.46±0.07 | 32.61±0.13 | 27.02±0.06 | 25.38±0.04 | 33.16±0.17 | 28.57±0.10 | 25.33±0.04 | 33.07±0.10 |
| 1:10,000  | 32.77      | 28.76      | 35.57      | 31.14      | 28.8       | N/A        | 31.93      | 28.65      | N/A        |
|           | 31.68      | 28.68      | N/A        | 30.79      | 28.9       | N/A        | 31.99      | 28.64      | N/A        |
|           | 31.35      | 28.46      | N/A        | 30.34      | 28.77      | N/A        | 31.8       | 28.45      | 34.81      |
| Mean±SEM  | 31.93±0.43 | 28.63±0.09 | N/A        | 30.76±0.23 | 28.82±0.04 | N/A        | 31.91±0.06 | 28.58±0.07 | N/A        |

Comparison of the performance of different apple specific internal controls and the 28S amplicon (E=97.2%, R<sup>2</sup>=0.99) in a dilution series of three apple root samples. The values represent the C<sub>q</sub> values (quantification/threshold cycle) of three technical replicates.
